# Supplementary material for: A novel floating photocatalyst device based on cloth canvas impregnated with iron oxide
Source: Royal Society of Chemistry journal article supplement (doi:10.1039/c3nj00274h), 2013-01-01
Supplement: c3nj00274h.pdf [file c3nj00274h.pdf]

## Supporting Information

### A novel floating photocatalyst device based on cloth canvas impregnated with iron oxide

Henrique dos S. Oliveira,<sup>a</sup> Adilson C. Silva,<sup>a</sup> and João P. de Mesquita,<sup>a</sup> Fabiano V. Pereira,<sup>a</sup> Diana Q. Lima,<sup>a</sup> Jose D. Fabris<sup>b</sup>, Flavia C.C. Moura,<sup>a</sup> Luiz C. A. Oliveira<sup>\*a</sup>

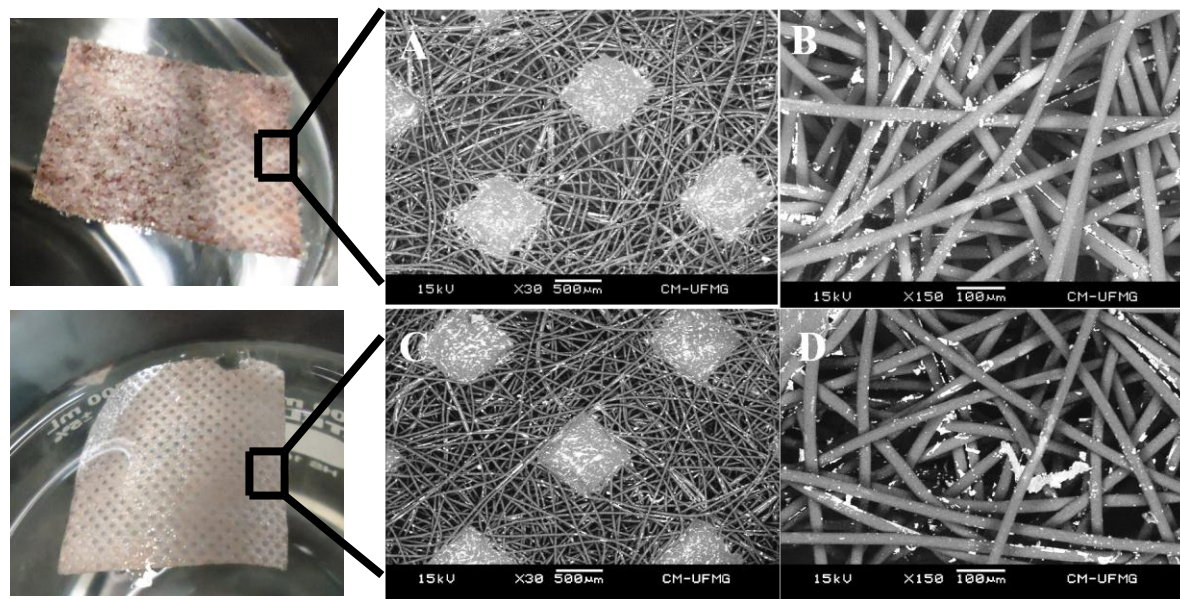

**Fig. S1** Pictures and SEM of the impregnated canvas before (A,B) and after five cycles of reactions (C,D).

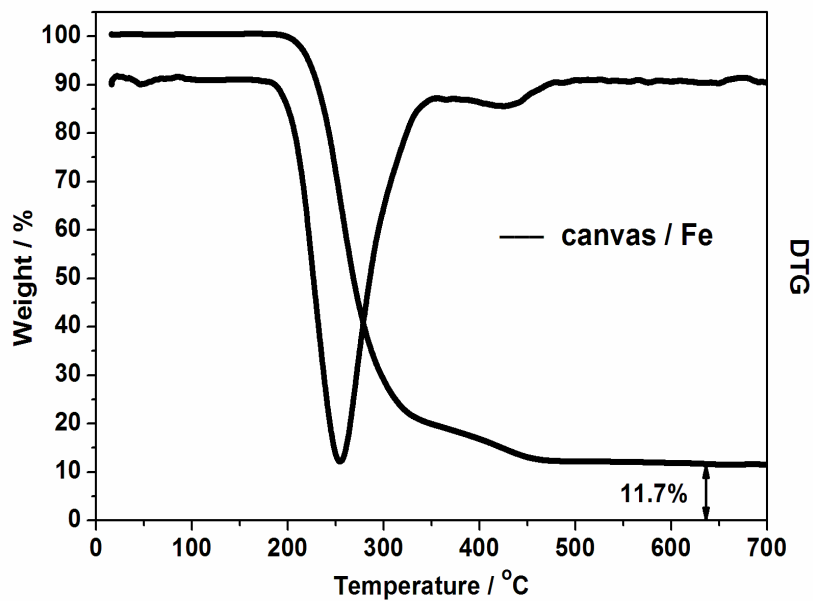

**Fig. S2** TG/DTG analysis of the canvas/Fe.

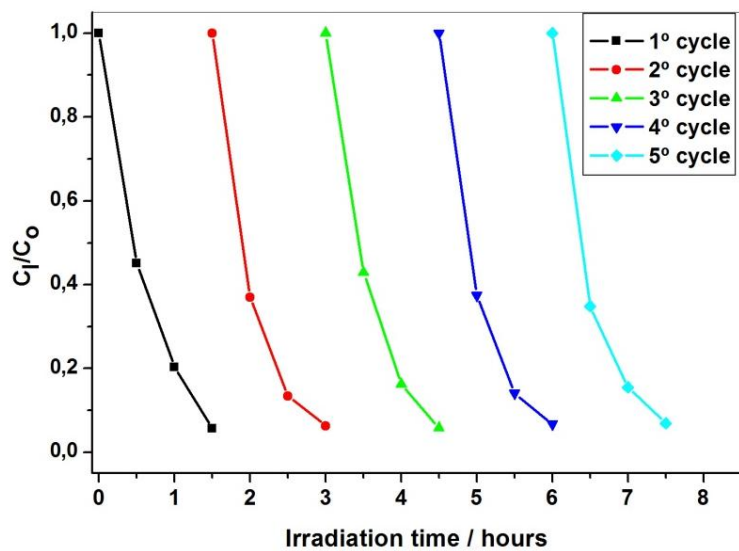

**Fig. S3** Photocatalytic activity of impregnated canvas floating for five cycles of reaction.

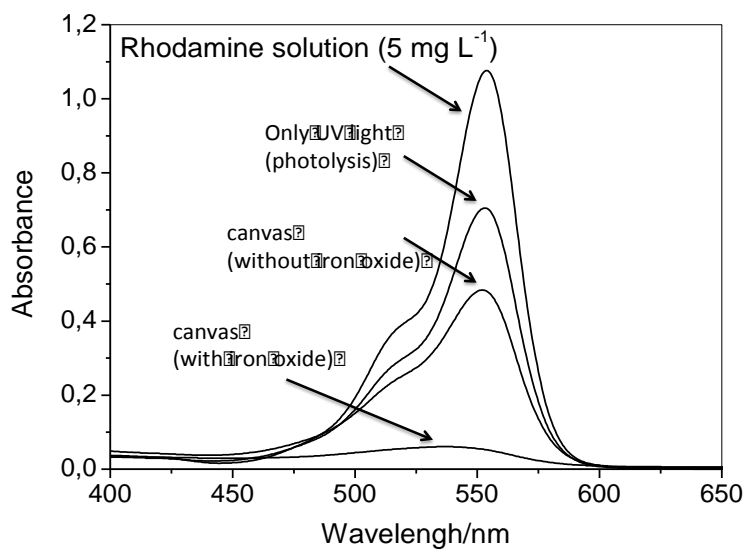

**Fig. S4.** UV-Vis spectroscopy of the standard Rh-B (5 mg L<sup>-1</sup>) and scan mode removal profile at different conditions after 90 min.
